# Supplementary material for: Optimizing Nitrogen Application in Root Vegetables from Their Growth, Biochemical and Antioxidant Response to Urea Fertilizer
Source: MDPI journal article supplement (doi:10.3390/agriculture11080704), 2021-07-27
Supplement: s1 [file s1]

**Figure S1.** Scanning electron micrograph and energy dispersive X-ray of the soil.

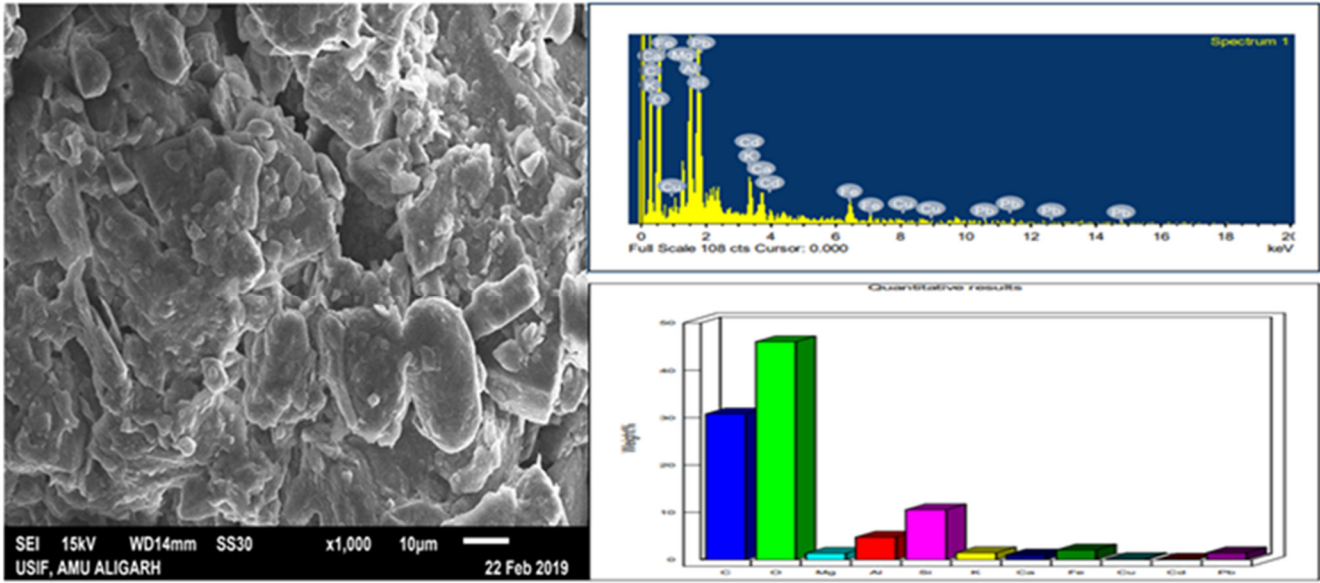

**Table S1.** Carrot repeat experiment results.

| Treat-<br>ment | SL    | SFW   | SDW   | Leaves | LA    | Stm.<br>Area | RL    | Cir-<br>cum. | RFW   | RDW   | Chl. A | Chl. B | Carote<br>n. | NRA    | Carbohy-<br>drate | Pro-<br>tein | Scav-<br>enging<br>activity | O2<br>radicals |
|----------------|-------|-------|-------|--------|-------|--------------|-------|--------------|-------|-------|--------|--------|--------------|--------|-------------------|--------------|-----------------------------|----------------|
| C              | 75.46 | 65.65 | 16.75 | 5.58   | 4.44  | 4.52         | 14.89 | 8.33         | 30.66 | 7.93  | 1.63   | 0.9    | 0.24         | 327.42 | 257.3333          | 1.02         | 20.8                        | 3.3            |
| U50            | 77.18 | 67.07 | 19.14 | 6.87   | 5.66  | 6.39         | 17.48 | 9.23         | 31.43 | 8.73  | 1.78   | 0.96   | 0.28         | 368.75 | 266.3333          | 1.1          | 21.97                       | 3              |
| U100           | 80.93 | 71.7  | 22.59 | 7.75   | 7.45  | 9.19         | 20.27 | 11.11        | 33.44 | 10.84 | 1.99   | 1.05   | 0.37         | 421.87 | 277.0667          | 1.16         | 23.59                       | 2.6            |
| U150           | 84.21 | 76.57 | 25.57 | 9.84   | 10.11 | 12.21        | 24.03 | 14.22        | 36.57 | 12.92 | 2.67   | 1.43   | 0.47         | 500.42 | 290.3333          | 1.23         | 22.01                       | 2.2            |
| U200           | 83.04 | 75.63 | 24.99 | 9.44   | 9.33  | 11.09        | 23.86 | 13.56        | 35.55 | 12.44 | 2.28   | 1.38   | 0.43         | 468.62 | 283.6667          | 1.22         | 18.43                       | 2.1            |

SL= Shoot length (cm); SFW= Shoot fresh weight (g); SDW= Shoot dry weight (g); Leaves (plant<sup>-1</sup>); LA= Leaf area (cm<sup>2</sup> leaf<sup>-1</sup>); Stm. Area= Stomata area (µm<sup>2</sup>); Circum= Root circumference (cm); RFW= Root fresh weight (g); RDW= Root dry weight (g); Chl. A = Chlorophyll A (mg g<sup>-1</sup> FW); Chl. B= Chlorophyll B (mg g<sup>-1</sup> FW); Caroten.= Carotenoid content (mg g<sup>-1</sup> FW); NRA= Nitrate reductase activity( n mole NO<sub>2</sub> g<sup>-1</sup> FW); Carbohydrate (mg g<sup>-1</sup> DW); Protein (mg g<sup>-1</sup> FW); Scavenging activity (%); O2 radicals (µmole g<sup>-1</sup> FW).

**Table S2.** Beetroot repeat experiment results.

| Treat-<br>ment | SL    | SFW   | SDW   | Leaves | LA    | Stm.<br>area | RL    | Cir-<br>cum. | RFW   | RDW   | Chl. A | Chl. B | Carote<br>n. | NRA    | Carbohy-<br>drate | Pro-<br>tein | Scav-<br>enging<br>activity | O2<br>radicals |
|----------------|-------|-------|-------|--------|-------|--------------|-------|--------------|-------|-------|--------|--------|--------------|--------|-------------------|--------------|-----------------------------|----------------|
| C              | 18.84 | 24.32 | 6.87  | 8.49   | 9.68  | 22.22        | 10.88 | 13.44        | 70.17 | 19.39 | 0.48   | 0.25   | 0.21         | 301.33 | 253.33            | 0.94         | 49.26                       | 2.9            |
| U50            | 21.87 | 27.5  | 9.03  | 9.05   | 11.21 | 23.11        | 13.97 | 15.01        | 72.37 | 21.92 | 0.5    | 0.28   | 0.22         | 337.22 | 276.66            | 0.97         | 57.9                        | 2.7            |
| U100           | 24.92 | 31.94 | 12.59 | 11.18  | 14.39 | 25.34        | 17.89 | 19.77        | 75.08 | 25.53 | 0.53   | 0.29   | 0.25         | 389.6  | 285.78            | 1.02         | 58.11                       | 2.4            |
| U150           | 29.19 | 36.74 | 16.44 | 15.26  | 18.07 | 27.88        | 22.32 | 24.6         | 79.1  | 31.07 | 0.59   | 0.32   | 0.28         | 448.1  | 305.18            | 1.12         | 57.11                       | 2.1            |
| U200           | 29.07 | 35.91 | 16.37 | 14.4   | 17.33 | 26.88        | 21.98 | 24.49        | 78.92 | 30.1  | 0.58   | 0.3    | 0.27         | 424.11 | 297.33            | 1.09         | 43.17                       | 1.9            |

SL= Shoot length (cm); SFW= Shoot fresh weight (g); SDW= Shoot dry weight (g); Leaves (plant<sup>-1</sup>); LA= Leaf area (cm<sup>2</sup> leaf<sup>-1</sup>); Stm. Area= Stomata area (µm<sup>2</sup>); Circum= Root circumference (cm); RFW= Root fresh weight (g); RDW= Root dry weight (g); Chl. A = Chlorophyll A (mg g<sup>-1</sup> FW); Chl. B= Chlorophyll B (mg g<sup>-1</sup> FW); Caroten.= Carotenoid content (mg g<sup>-1</sup> FW); NRA= Nitrate reductase activity( n mole NO<sub>2</sub> g<sup>-1</sup> FW); Carbohydrate (mg g<sup>-1</sup> DW); Protein (mg g<sup>-1</sup> FW); Scavenging activity (%); O2 radicals (µmole g<sup>-1</sup> FW).
